# Supplementary material
Source: HighWire-hosted journal article supplement (http://ghspjournal.org/highwire/filestream/3274/field_highwire_adjunct_files/2/19-00251-Kahn-Supplementary_Table3.pdf)
Supplement: 19-00251-Kahn-Supplementary_Table3.pdf [file 19-00251-Kahn-Supplementary_Table3.pdf]

Supplement to: Kahn D, Pool KL, Phiri L, et al. Diagnostic utility and impact on clinical decision making of focused assessment with sonography for HIV-associated tuberculosis in Malawi: a prospective cohort study. *Glob Health Sci Pract.* 2020;8(1).  
<https://doi.org/10.9745/GHSP-D-19-00251>

**Supplementary Table 3. FASH Findings of Participants at an Urban Medical Center, Lilongwe, Malawi, Who Died Without Microbiologic Confirmation (n=12) Reclassified From Unlikely TB Group Into Probable/Confirmed TB Group, Stratified by TB Status**

|                                   | Overall, No. (%)<br>N=181 | Unlikely TB, No. (%)<br>n=113 | Probable/Confirmed TB, No. (%)<br>n=68 | P Value |
|-----------------------------------|---------------------------|-------------------------------|----------------------------------------|---------|
| Pericardial effusion <sup>a</sup> | 36 (19.9)                 | 6 (5.3)                       | 30 (44.1)                              | <.001   |
| Pleural effusion                  | 9 (5.0)                   | 1 (0.9)                       | 8 (11.8)                               | <.001   |
| Ascites                           | 14 (7.7)                  | 3 (2.7)                       | 11 (16.2)                              | .002    |
| Abdominal lymphadenopathy         | 15 (8.3)                  | 0 (0)                         | 15 (22.4)                              | <.001   |
| Liver lesions                     | 4 (2.2)                   | 2 (1.8)                       | 2 (2.9)                                | .63     |
| Splenic lesions                   | 5 (2.8)                   | 2 (1.8)                       | 3 (4.4)                                | .37     |
| FASH positive <sup>b</sup>        | 70 (38.7)                 | 20 (17.7)                     | 50 (73.5)                              | <.001   |
| FASH negative                     | 111 (61.3)                | 93 (82.3)                     | 18 (26.5)                              | <.001   |

Abbreviations: FASH, focused assessment with sonography for HIV-associated tuberculosis; TB, tuberculosis.

<sup>a</sup> Trace pericardial effusions were excluded from the analysis due to unclear clinical significance.

<sup>b</sup> Any single finding of the protocol is positive.
